# Supplementary material for: Integrating On-Treatment Modified Glasgow Prognostic Score and Imaging to Predict Response and Outcomes in Metastatic Renal Cell Carcinoma
Source: PubMed Central journal article supplement (PMC10288377; doi:10.1001/jamaoncol.2023.1822), 2023-06-22
Supplement: jamaoncol-e231822-s001.pdf [file jamaoncol-e231822-s001.pdf]

## Supplementary Online Content

Saal J, Bald T, Eckstein M, et al. Integrating on-treatment modified Glasgow prognostic score and imaging to predict response and outcomes in metastatic renal cell carcinoma. *JAMA Oncol*. Published online June 22, 2023. doi:10.1001/jamaoncol.2023.1822

**eFigure 1.** Flowchart Showing the Number of Patients Included for Our Analyses

**eFigure 2.** On-Treatment mGPS in the High-Risk Subgroup

**eFigure 3.** The On-Treatment mGPS Predicts Treatment Response in the IMmotion151 Discovery Cohort

**eFigure 4.** In the Phase 3 IMmotion151 Trial, On-Treatment mGPS Predicts Outcomes at 12, 24 and 35 weeks

**eTable 1.** Baseline Characteristics in the IMmotion151 Cohort, Stratified by mGPS at First Staging

**eTable 2.** Univariate and Multivariate Cox-Regression Analysis of the Entire IMmotion151 Cohort for On-Treatment mGPS and IRC-RECIST at First Staging

**eTable 3.** Univariate Cox-Regression Analysis for mGPS for the IRC-RECIST Subgroups in the IMmotion151 Trial

This supplementary material has been provided by the authors to give readers additional information about their work.

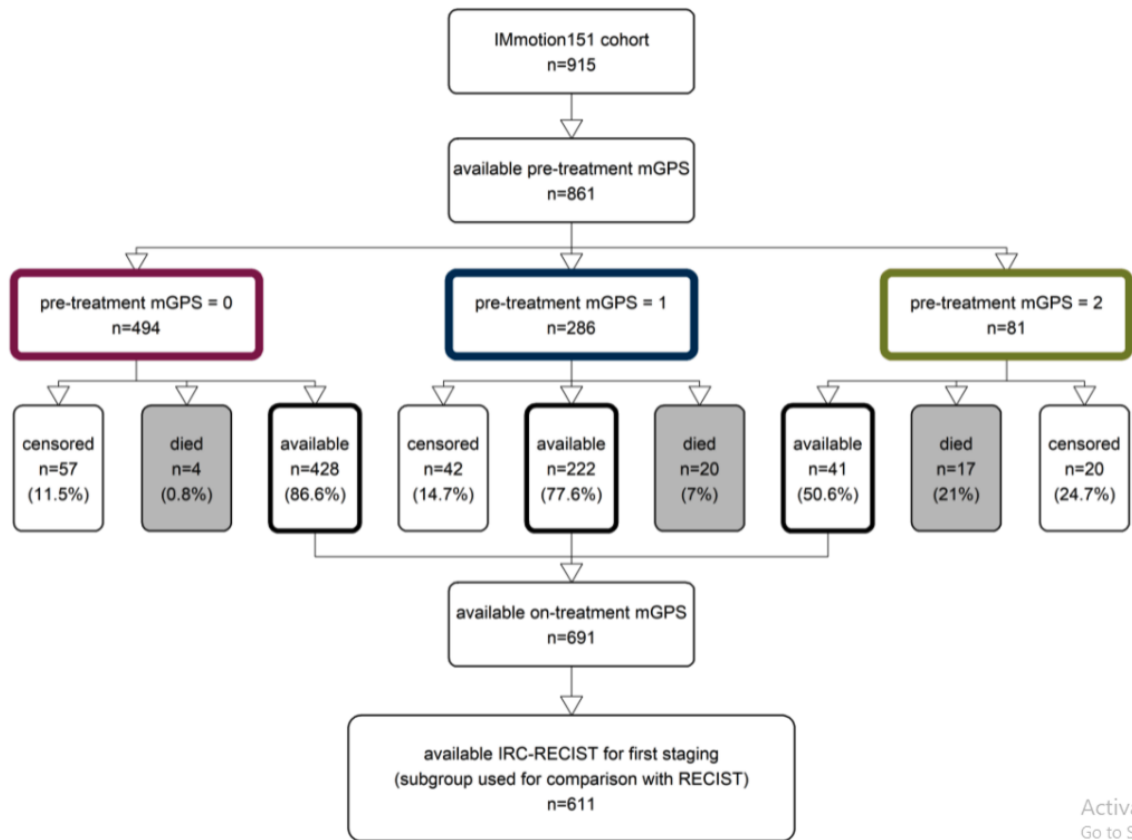

Activate V  
Go to Setting

**eFigure 1:** Flowchart showing the number of patients included for our analyses.

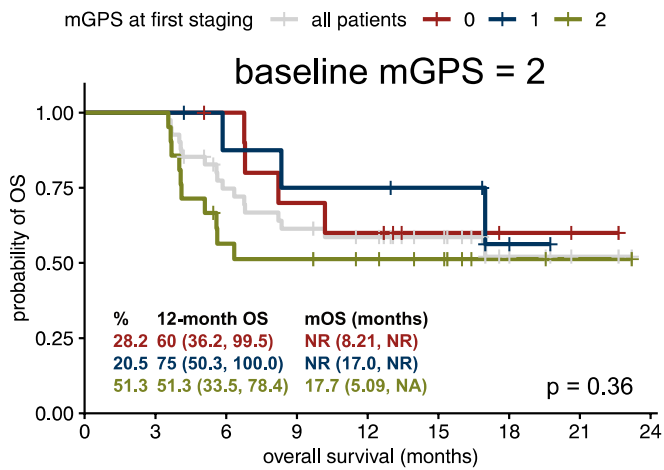

Number at risk

|                             |    |    |    |    |    |    |   |   |   |
|-----------------------------|----|----|----|----|----|----|---|---|---|
| $\square$                   | 41 | 41 | 28 | 23 | 20 | 14 | 6 | 2 | 0 |
| $\color{red}\blacksquare$   | 11 | 11 | 10 | 7  | 6  | 3  | 2 | 1 | 0 |
| $\color{blue}\blacksquare$  | 9  | 9  | 7  | 6  | 6  | 5  | 2 | 0 | 0 |
| $\color{green}\blacksquare$ | 21 | 21 | 11 | 10 | 8  | 6  | 2 | 1 | 0 |

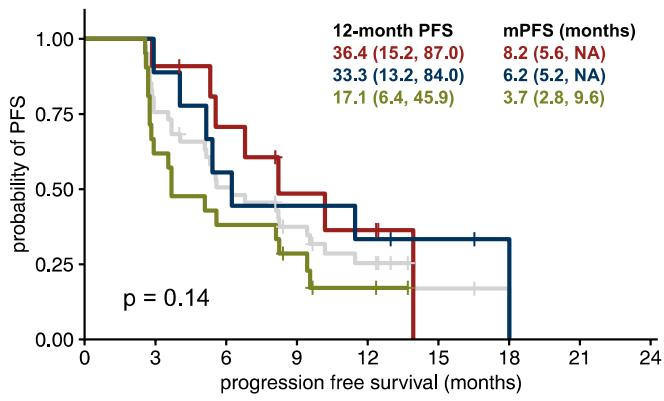

Number at risk

|                             |    |    |    |    |   |   |   |   |   |
|-----------------------------|----|----|----|----|---|---|---|---|---|
| $\square$                   | 41 | 31 | 20 | 13 | 8 | 2 | 1 | 0 | 0 |
| $\color{red}\blacksquare$   | 11 | 10 | 7  | 4  | 3 | 0 | 0 | 0 | 0 |
| $\color{blue}\blacksquare$  | 9  | 8  | 5  | 4  | 3 | 2 | 1 | 0 | 0 |
| $\color{green}\blacksquare$ | 21 | 13 | 8  | 5  | 2 | 0 | 0 | 0 | 0 |

**eFigure 2: On-treatment mGPS in the high-risk subgroup**

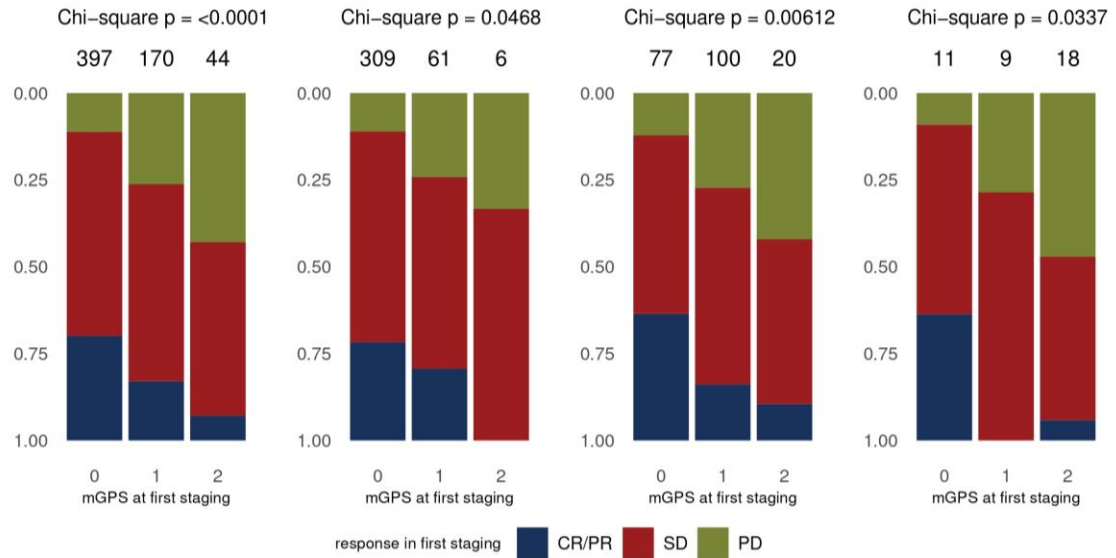

**eFigure 3:** The on-treatment mGPS predicts treatment response in the IMmotion151 discovery cohort. On-treatment mGPS, for the whole cohort but also the mGPS subgroups, is significantly associated with response at the time at first radiological staging as defined by IRC RECIST evaluation. Sample sizes for the mGPS subgroups are shown above the bar. PD, progressive disease; SD, stable disease; CR/PR, partial or complete remission.

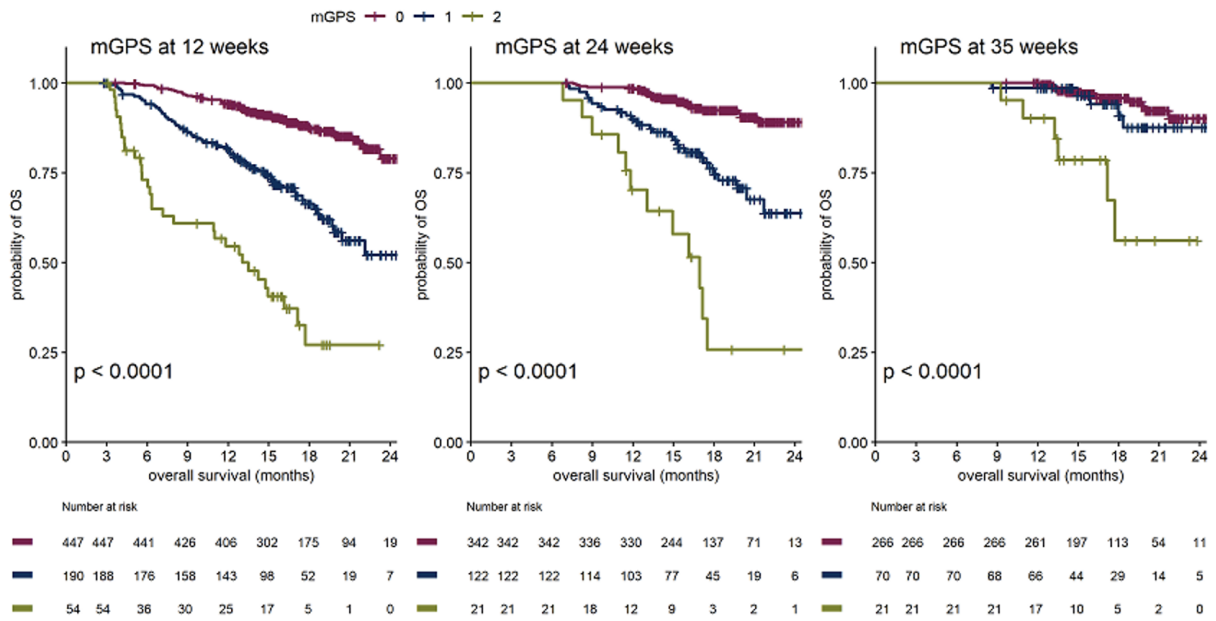

**eFigure 4:** In the Phase 3 IMmotion151 trial, on-treatment mGPS predicts outcomes at 12, 24 and 35 weeks.

**eTable 1:** Baseline characteristics in the IMmotion151 cohort, stratified by mGPS at first staging.

| <b>Characteristic</b>        | <b>N = 691</b> |
|------------------------------|----------------|
| age (years)                  |                |
| < 65                         | 443 (64%)      |
| ≥ 65                         | 248 (36%)      |
| sex                          |                |
| female                       | 177 (26%)      |
| male                         | 514 (74%)      |
| IMDC score                   |                |
| low risk                     | 172 (25%)      |
| intermediate risk            | 426 (62%)      |
| high risk                    | 93 (13%)       |
| PD-L1 status (IC score ≥1)   |                |
| negative                     | 424 (61%)      |
| positive                     | 267 (39%)      |
| prior nephrectomy            | 520 (75%)      |
| Karnofsky performance status |                |
| < 80                         | 141 (21%)      |
| 80-90                        | 250 (36%)      |
| 100                          | 296 (43%)      |
| Unknown                      | 4              |

**eTable 2:** Univariate and multivariate Cox-regression analysis of the entire IMmotion151 cohort for on-treatment mGPS and IRC-RECIST at first staging.

| Characteristic                         | OS  |                 |                     |                  | PFS |                 |                     |                  |
|----------------------------------------|-----|-----------------|---------------------|------------------|-----|-----------------|---------------------|------------------|
|                                        | N   | HR <sup>1</sup> | 95% CI <sup>1</sup> | p-value          | N   | HR <sup>1</sup> | 95% CI <sup>1</sup> | p-value          |
| univariate cox, all patients           |     |                 |                     |                  |     |                 |                     |                  |
| <b>mGPS at first staging</b>           | 611 |                 |                     |                  | 611 |                 |                     |                  |
| 0                                      |     | —               | —                   |                  |     | —               | —                   |                  |
| 1                                      |     | 2.93            | 1.98, 4.34          | <b>&lt;0.001</b> |     | 1.88            | 1.51, 2.35          | <b>&lt;0.001</b> |
| 2                                      |     | 8.88            | 5.48, 14.4          | <b>&lt;0.001</b> |     | 3.83            | 2.70, 5.44          | <b>&lt;0.001</b> |
| <b>response in first staging (IRC)</b> | 611 |                 |                     |                  | 611 |                 |                     |                  |
| CR/PR                                  |     | —               | —                   |                  |     | —               | —                   |                  |
| SD                                     |     | 2.06            | 1.13, 3.74          | <b>0.018</b>     |     | 1.36            | 1.04, 1.79          | <b>0.025</b>     |
| PD                                     |     | 9.21            | 5.00, 17.0          | <b>&lt;0.001</b> |     | 6.84            | 5.00, 9.35          | <b>&lt;0.001</b> |
| multivariate cox, all patients         |     |                 |                     |                  |     |                 |                     |                  |
| <b>response in first staging (IRC)</b> | 611 |                 |                     |                  | 611 |                 |                     |                  |
| CR/PR                                  |     | —               | —                   |                  |     | —               | —                   |                  |
| SD                                     |     | 1.67            | 0.91, 3.05          | 0.10             |     | 1.23            | 0.94, 1.62          | 0.13             |
| PD                                     |     | 6.08            | 3.24, 11.4          | <b>&lt;0.001</b> |     | 5.56            | 4.02, 7.68          | <b>&lt;0.001</b> |
| <b>mGPS at first staging</b>           | 611 |                 |                     |                  | 611 |                 |                     |                  |
| 0                                      |     | —               | —                   |                  |     | —               | —                   |                  |
| 1                                      |     | 2.32            | 1.55, 3.46          | <b>&lt;0.001</b> |     | 1.57            | 1.25, 1.98          | <b>&lt;0.001</b> |
| 2                                      |     | 6.21            | 3.78, 10.2          | <b>&lt;0.001</b> |     | 2.79            | 1.94, 4.00          | <b>&lt;0.001</b> |

<sup>1</sup>HR = Hazard Ratio, CI = Confidence Interval

**eTable 3:** Univariate Cox-regression analysis for mGPS for the IRC-RECIST subgroups in the IMmotion151 trial.

| Characteristic        | OS  |                 |                     |                  | PFS |                 |                     |                  |
|-----------------------|-----|-----------------|---------------------|------------------|-----|-----------------|---------------------|------------------|
|                       | N   | HR <sup>1</sup> | 95% CI <sup>1</sup> | p-value          | N   | HR <sup>1</sup> | 95% CI <sup>1</sup> | p-value          |
| <b>CR/PR</b>          |     |                 |                     |                  |     |                 |                     |                  |
| mGPS at first staging | 150 |                 |                     |                  | 150 |                 |                     |                  |
| 0                     |     | —               | —                   |                  |     | —               | —                   |                  |
| 1                     |     | 2.75            | 0.82, 9.25          | 0.10             |     | 2.17            | 1.27, 3.71          | <b>0.004</b>     |
| 2                     |     | 8.67            | 1.06, 71.0          | <b>0.044</b>     |     | 11.1            | 3.36, 36.8          | <b>&lt;0.001</b> |
| <b>SD</b>             |     |                 |                     |                  |     |                 |                     |                  |
| mGPS at first staging | 356 |                 |                     |                  | 356 |                 |                     |                  |
| 0                     |     | —               | —                   |                  |     | —               | —                   |                  |
| 1                     |     | 2.52            | 1.45, 4.37          | <b>&lt;0.001</b> |     | 1.50            | 1.11, 2.04          | <b>0.009</b>     |
| 2                     |     | 6.52            | 3.20, 13.3          | <b>&lt;0.001</b> |     | 2.58            | 1.54, 4.30          | <b>&lt;0.001</b> |
| <b>PD</b>             |     |                 |                     |                  |     |                 |                     |                  |
| mGPS at first staging | 105 |                 |                     |                  | 105 |                 |                     |                  |
| 0                     |     | —               | —                   |                  |     | —               | —                   |                  |
| 1                     |     | 1.92            | 0.99, 3.72          | 0.052            |     | 1.38            | 0.88, 2.14          | 0.2              |
| 2                     |     | 5.34            | 2.54, 11.2          | <b>&lt;0.001</b> |     | 2.00            | 1.13, 3.54          | <b>0.018</b>     |

<sup>1</sup>HR = Hazard Ratio, CI = Confidence Interval
