# Supplementary material for: Integrating On-Treatment Modified Glasgow Prognostic Score and Imaging to Predict Response and Outcomes in Metastatic Renal Cell Carcinoma
Source: PubMed Central journal article supplement (PMC10288377; doi:10.1001/jamaoncol.2023.1822), 2023-06-22
Supplement: jamaoncol-e231822-s002.pdf [file jamaoncol-e231822-s002.pdf]

## Data Sharing Statement

Saal. Integrating On-Treatment Modified Glasgow Prognostic Score and Imaging to Predict Response and Outcomes in Metastatic Renal Cell Carcinoma. *JAMA Oncol.* Published June 22, 2023. doi:10.1001/jamaoncol.2023.1822

### Data

**Data available:** Yes

**Data types:** Participant data with identifiers

**How to access data:** This publication is based on research using data from Roche that has been made available through Vivli, Inc.

**When available:** With publication

### Supporting Documents

**Document types:** None

### Additional Information

**Who can access the data:** anyone requesting the data through Vivli, Inc.

**Types of analyses:** for any purpose

**Mechanisms of data availability:** after approval of a proposal and with a signed data access agreement
